# Supplementary material for: For Whom Money Matters Less: Social Connectedness as a Resilience Resource in the UK
Source: Springer Nature journal article supplement (doi:10.1007/s11205-014-0858-5), 2015-01-05
Supplement: MOESM1 [file 5758354]

# Online resource 1

## 1) Loginc > p25

## 2) Loginc > p25 & < p75

| <b>Fixed part of model</b>           | <b>b</b>     | <b>se</b> | <b>b</b>     | <b>se</b> |
|--------------------------------------|--------------|-----------|--------------|-----------|
| Year                                 | -0.01        | 0.00      | -0.01        | 0.00      |
| Income                               | -0.07        | 0.04      | -0.02        | 0.10      |
| Instrumental                         | -0.13        | 0.08      | -0.08        | 0.09      |
| Emotional isolated                   | -0.44        | 0.12      | -0.35        | 0.13      |
| Socially isolated                    | -0.63        | 0.09      | -0.62        | 0.10      |
| Traditional                          | -0.27        | 0.04      | -0.24        | 0.05      |
| Integrated                           | -0.12        | 0.05      | -0.10        | 0.05      |
| Instrumental * inc                   | 0.30         | 0.13      | 0.47         | 0.22      |
| Emotionally isolated * inc           | 0.66         | 0.20      | 0.99         | 0.35      |
| Socially isolated * inc              | 0.44         | 0.15      | 0.34         | 0.25      |
| Traditional * inc                    | 0.17         | 0.05      | 0.15         | 0.11      |
| Integrated * inc                     | 0.14         | 0.06      | 0.17         | 0.13      |
| Constant                             | 5.50         | 0.04      | 5.50         | 0.04      |
| <b>Random effects</b>                | <b>var</b>   | <b>se</b> | <b>var</b>   | <b>se</b> |
| Random intercept: person             | 0.75         | 0.02      | 0.80         | 0.02      |
| Occasion residuals                   | 0.59         | 0.01      | 0.63         | 0.01      |
| <b>Intra-class correlation</b>       | 0.56         |           | 0.56         |           |
| <b>N: observations / individuals</b> | 25009 / 4542 |           | 16631 / 3936 |           |

**Online resource 1** model 2b replicated with different samples, 1) excluding observations in the lowest income quartile and 2) with the highest quartile also excluded
