# Supplementary material for: For Whom Money Matters Less: Social Connectedness as a Resilience Resource in the UK
Source: Soc Indic Res. 2015 Jan 6;125(2):509–35. doi: 10.1007/s11205-014-0858-5 (PMC4703614; doi:10.1007/s11205-014-0858-5)
Supplement: Supplementary file 2 — Supplementary material 2 (PDF 305 kb) [file 11205_2014_858_MOESM2_ESM.pdf]

## Online Resource 2

| Model 2b                      |              |           | Model 4b                      |              |           |
|-------------------------------|--------------|-----------|-------------------------------|--------------|-----------|
| Fixed part of model           | b            | se        | Fixed part of model           | b            | se        |
| Year                          | -0.01        | 0.00      | Year                          | 0.00         | 0.00      |
| Income                        | -0.02        | 0.03      | Income                        | 0.06         | 0.01      |
| Instrumental                  | -0.08        | 0.08      | Worse off                     | 0.07         | 0.03      |
| Emotional isolated            | -0.39        | 0.11      | Better off                    | -0.19        | 0.03      |
| Socially isolated             | -0.52        | 0.09      | Instrumental                  | -0.05        | 0.08      |
| Traditional                   | -0.26        | 0.04      | Emotional isolated            | -0.49        | 0.11      |
| Integrated                    | -0.10        | 0.04      | Socially isolated             | -0.47        | 0.09      |
| Instrumental * inc            | 0.21         | 0.08      | Traditional                   | -0.27        | 0.04      |
| Emotionally isolated * inc    | 0.28         | 0.12      | Integrated                    | -0.08        | 0.05      |
| Socially isolated * inc       | 0.10         | 0.09      | Instrumental * worse          | -0.20        | 0.08      |
| Traditional * inc             | 0.15         | 0.04      | Emotionally isolated * worse  | 0.25         | 0.13      |
| Integrated * inc              | 0.09         | 0.04      | Socially isolated * worse     | -0.23        | 0.09      |
| Constant                      | 5.49         | 0.03      | Traditional * worse           | -0.03        | 0.04      |
| <b>Random effects</b>         | <b>var</b>   | <b>se</b> | Integrated * worse            | 0.00         | 0.04      |
| Random intercept: person      | 0.80         | 0.02      | Instrumental * better         | -0.09        | 0.08      |
| Occasion residuals            | 0.68         | 0.01      | Emotionally isolated * better | 0.10         | 0.15      |
|                               |              |           | Socially isolated * better    | 0.04         | 0.10      |
| Intra-class correlation       | 0.54         |           | Traditional * better          | 0.07         | 0.04      |
| N: observations / individuals | 32133 / 4789 |           | Integrated * better           | -0.03        | 0.04      |
|                               |              |           | Constant                      | 5.49         | 0.04      |
|                               |              |           | <b>Random effects</b>         | <b>var</b>   | <b>se</b> |
|                               |              |           | Random intercept: person      | 0.79         | 0.02      |
|                               |              |           | Occasion residuals            | 0.67         | 0.01      |
|                               |              |           |                               |              |           |
|                               |              |           | Intra-class correlation       | 0.54         |           |
|                               |              |           | N: observations / individuals | 32031 / 4788 |           |
| Model 3b                      |              |           |                               |              |           |
| Fixed part of model           | b            | se        |                               |              |           |
| Year                          | -0.01        | 0.00      |                               |              |           |
| Income                        | 0.01         | 0.01      |                               |              |           |
| Financial situation           | 0.20         | 0.02      |                               |              |           |
| Instrumental                  | -0.18        | 0.14      |                               |              |           |
| Emotional isolated            | -0.50        | 0.20      |                               |              |           |
| Socially isolated             | -0.90        | 0.15      |                               |              |           |
| Traditional                   | -0.35        | 0.08      |                               |              |           |
| Integrated                    | -0.20        | 0.09      |                               |              |           |
| Instrumental * fisit          | 0.05         | 0.04      |                               |              |           |
| Emotionally isolated * fisit  | 0.06         | 0.06      |                               |              |           |
| Socially isolated * fisit     | 0.16         | 0.04      |                               |              |           |
| Traditional * fisit           | 0.06         | 0.02      |                               |              |           |
| Integrated * fisit            | 0.05         | 0.02      |                               |              |           |
| Constant                      | 4.82         | 0.07      |                               |              |           |
| <b>Random effects</b>         |              |           |                               |              |           |
| Random intercept: person      | 0.70         | 0.02      |                               |              |           |
| Occasion residuals            | 0.67         | 0.01      |                               |              |           |
|                               |              |           |                               |              |           |
| Intra-class correlation       | 0.51         |           |                               |              |           |
| N: observations / individuals | 32103 / 4789 |           |                               |              |           |

**Online resource 2** model 2b, 3b and 4b replicated with cases excluded where latent class assignment was based on a probability of below 0.9
